# Supplementary material for: Tumor-associated macrophages related signature in glioma
Source: publisher site journal article supplement (doi:10.18632/aging.203968), 2022-03-24
Supplement: Supplementary file [file aging-v14i6-203968-supplementary-material-SD1.pdf]

SUPPLEMENTARY FIGURES

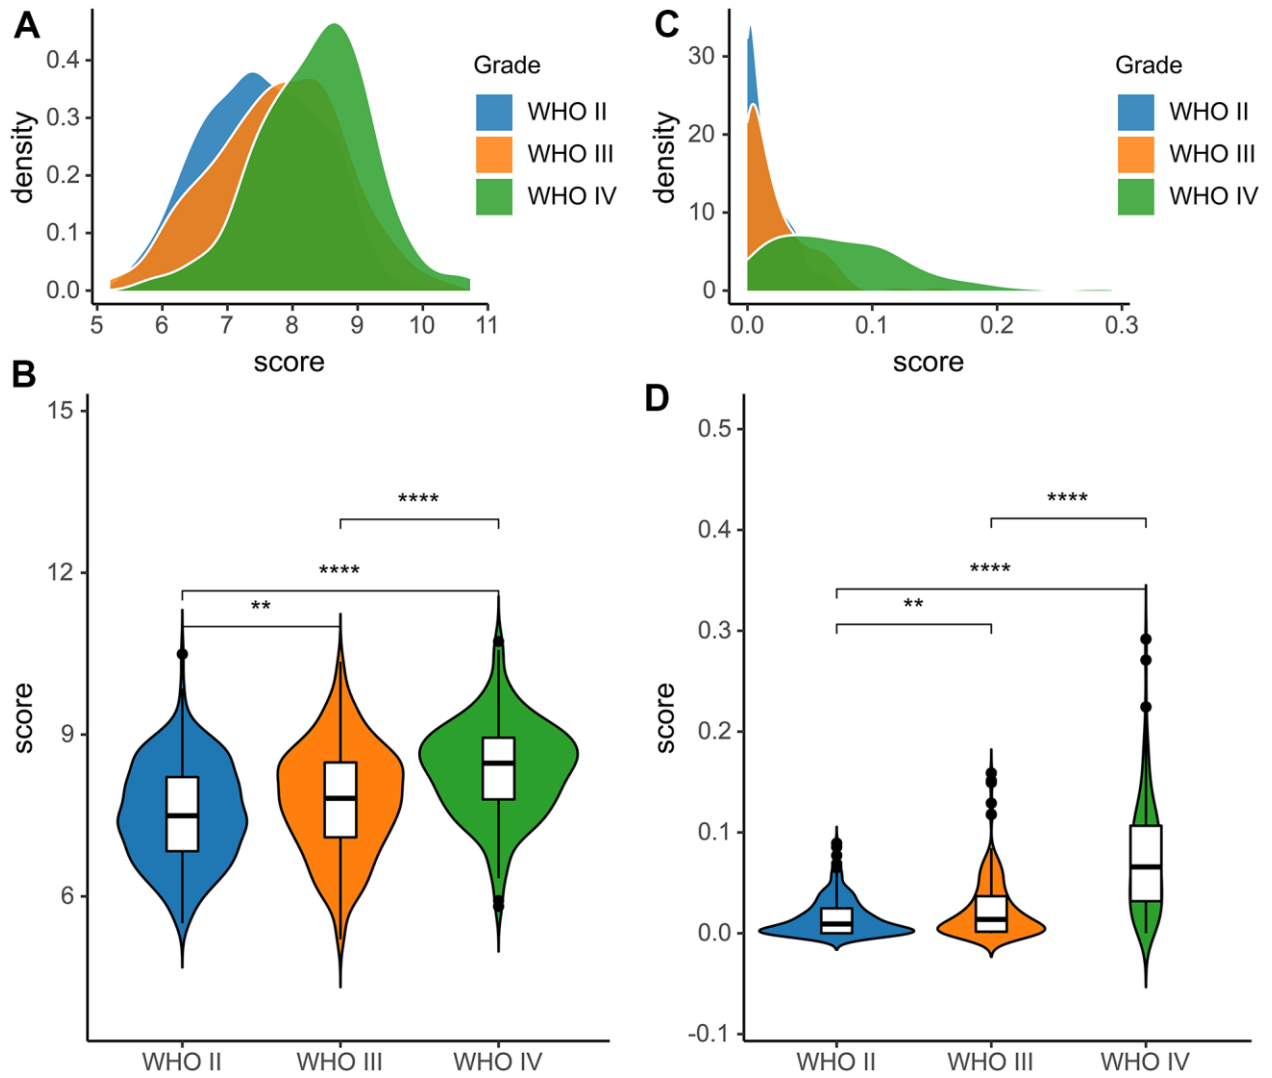

**Supplementary Figure 1. Analysis of TAM in the TCGA dataset.** (A, B) The TAM was analyzed by MCPOUNTER method. (C, D). The TAM was analyzed by XCELL method.

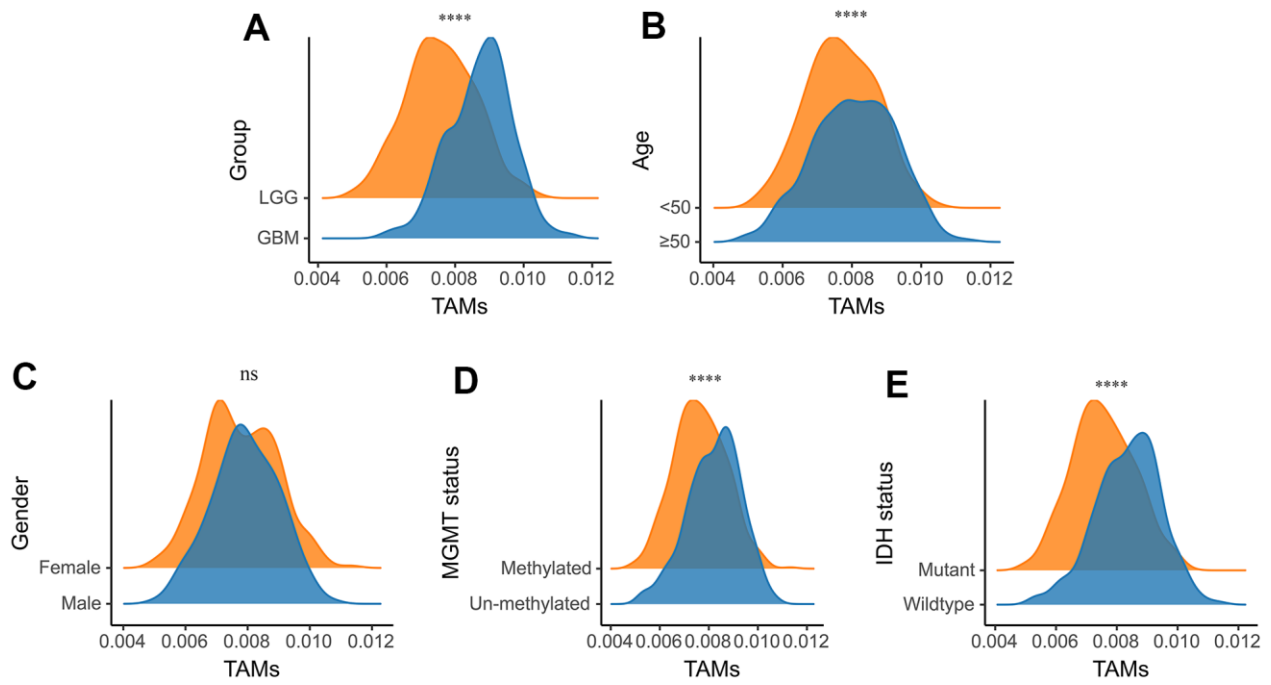

**Supplementary Figure 2.** Analysis of TAM in different WHO grade (A), age (B), gender (C), MGMT status (D) and IDH mutation status (E).

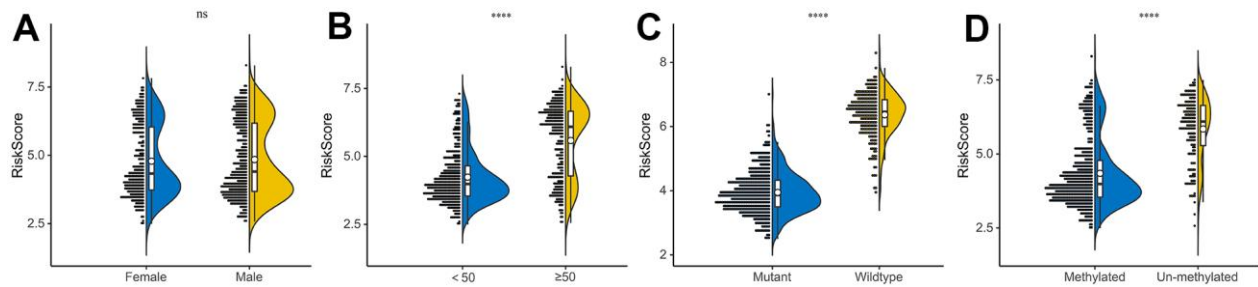

**Supplementary Figure 3.** The relationship between risk score and different gender (A), age (B), IDH mutation status (C), and MGMT status (D).
